# Supplementary material
Source: publisher figshare collection journal article supplement (https://sage.figshare.com/ndownloader/files/12891131)
Supplement: Supplementary file 1 [file 12891131]

Appendix Table A1. Intervention program for ACL Injury Prevention.

| Exercise                                                 | Time/<br>Reps | Set | Exercise<br>Interval | Set<br>Interval |
|----------------------------------------------------------|---------------|-----|----------------------|-----------------|
| <b>Week 1</b>                                            |               |     |                      |                 |
| Warm-up                                                  |               |     |                      |                 |
| Trunk Strengthening Exercise                             |               | 1   | 5"                   |                 |
| Pillar Bridge – Front                                    | 15"           |     |                      |                 |
| Plank                                                    | 15"           |     |                      |                 |
| Pillar Bridge – Lateral (each side)                      | 15"           |     |                      |                 |
| Dynamic Stretching                                       |               | 1   | 5"                   |                 |
| External Hip Rotation – Sidelying (each side)            | 12            |     |                      |                 |
| Leg Overs (each side)                                    | 6             |     |                      |                 |
| Knee Hug – Moving (each side)                            | 6             |     |                      |                 |
| Reverse Lunge – with Twist (each side)                   | 6             |     |                      |                 |
| Knee Hug to Forward Lunge – Elbow to Instep (each side)  | 6             |     |                      |                 |
| Lateral Squat – Low (each side)                          | 6             |     |                      |                 |
| Inverted Hamstring – Moving Forward (each side)          | 6             |     |                      |                 |
| Heel to Butt – Moving Forward with Arm Reach (each side) | 6             |     |                      |                 |
| Movement Integration and Proprioceptive Training         |               | 1   | 5"                   |                 |
| Medicine Ball – Squat and Push Forward                   | 15"           |     |                      |                 |
| Medicine Ball – Squat and Push Upward                    | 15"           |     |                      |                 |
| BOSU – Squat and Twist                                   | 15"           |     |                      |                 |
| BOSU – Alternating Toe-raise                             | 15"           |     |                      |                 |
| Main Exercise                                            |               |     |                      |                 |
| Hip Extension Training                                   |               | 1   | 10"                  |                 |
| Glute Bridge                                             | 30"           |     |                      |                 |
| Glute Bridge – Marching Knee Extension (each side)       | 30"           |     |                      |                 |
| Plyometrics Training                                     |               | 3   | 10"                  | 2'              |
| Jump – Front                                             | 5             |     |                      |                 |
| Jump – Lateral                                           | 5             |     |                      |                 |
| Jump – Lateral Front                                     | 5             |     |                      |                 |

|                                                  |                                                                                                         |      |   |         |
|--------------------------------------------------|---------------------------------------------------------------------------------------------------------|------|---|---------|
|                                                  | Jump – Body Rotation 90°                                                                                | 5    |   |         |
|                                                  | Jump – Body Rotation 180°                                                                               | 5    |   |         |
|                                                  | Jump – Box                                                                                              | 5    |   |         |
| Warm-down                                        |                                                                                                         |      |   |         |
| Muscle Relaxation                                |                                                                                                         |      |   |         |
|                                                  | Foam Roll – Lumbosacral, Quadriceps Femoris, Hamstring, Vastus Lateralis, Vastus Medialis, Calf         | 5'   |   |         |
| Static Stretching                                |                                                                                                         |      |   |         |
|                                                  | Static Stretching – Lumbosacral, Quadriceps Femoris, Hamstring, Vastus Lateralis, Vastus Medialis, Calf | 5'   |   |         |
| <hr/>                                            |                                                                                                         |      |   |         |
| <b>Week 2</b>                                    |                                                                                                         |      |   |         |
| Warm-up                                          |                                                                                                         |      |   |         |
| Trunk Strengthening Exercise                     |                                                                                                         |      | 1 | 5''     |
|                                                  | Pillar Bridge – Single Leg Lift (each side)                                                             | 15'' |   |         |
|                                                  | Plank – Single Arm Lift (each side)                                                                     | 15'' |   |         |
|                                                  | Pillar Bridge – Lateral (each side)                                                                     | 15'' |   |         |
| Dynamic Stretching (same as Week 1)              |                                                                                                         |      |   |         |
| Movement Integration and Proprioceptive Training |                                                                                                         |      | 1 | 5''     |
|                                                  | Medicine Ball – Squat and Push Lateral-forward (each side)                                              | 15'' |   |         |
|                                                  | Medicine Ball – Lateral Lunge and Push Forward (each side)                                              | 15'' |   |         |
|                                                  | BOSU – Squat Jump                                                                                       | 15'' |   |         |
|                                                  | BOSU – Single Leg Squat (each side)                                                                     | 15'' |   |         |
| Main Exercise                                    |                                                                                                         |      |   |         |
| Hip Extension Training                           |                                                                                                         |      | 1 | 5''     |
|                                                  | Balance Board – Glute Bridge – Marching Knee Extension (each side)                                      | 30'' |   |         |
|                                                  | Stiff-legged Deadlift                                                                                   | 30'' |   |         |
|                                                  | Stability Ball – Straight Leg Bridge                                                                    | 30'' |   |         |
| Plyometrics Training – Hop                       |                                                                                                         |      | 2 | 10'' 2' |
|                                                  | Hop – Front (each side)                                                                                 | 6    |   |         |
|                                                  | Hop – Lateral (each side)                                                                               | 6    |   |         |

|                                                  |                                                          |     |   |     |    |
|--------------------------------------------------|----------------------------------------------------------|-----|---|-----|----|
|                                                  | Hop – Front and Body Rotation 90° (each side)            | 6   |   |     |    |
|                                                  | Hop – Lateral and Body Rotation 90° (each side)          | 6   |   |     |    |
| Plyometrics Training – Bound                     |                                                          |     | 2 | 10" | 2' |
|                                                  | Bound – Front (each side)                                | 6   |   |     |    |
|                                                  | Bound – Lateral (each side)                              | 6   |   |     |    |
|                                                  | Bound – Lateral Front (each side)                        | 6   |   |     |    |
| Warm-down (same as Week 1)                       |                                                          |     |   |     |    |
| <b>Week 3</b>                                    |                                                          |     |   |     |    |
| Warm-up                                          |                                                          |     |   |     |    |
| Trunk Strengthening Exercise                     |                                                          |     | 1 | 5"  |    |
|                                                  | Crocodile Pillar Bridge – Single Leg Lift (each side)    | 15" |   |     |    |
|                                                  | Crocodile Push-up (each side)                            | 15" |   |     |    |
|                                                  | Pillar Bridge – Lateral (each side)                      | 15" |   |     |    |
| Dynamic Stretching (same as Week 1)              |                                                          |     |   |     |    |
| Movement Integration and Proprioceptive Training |                                                          |     | 1 | 5"  |    |
|                                                  | Medicine Ball – Rear Lunge and Push Forward (each side)  | 20" |   |     |    |
|                                                  | Medicine Ball – Rear Lunge and Twist (each side)         | 20" |   |     |    |
|                                                  | BOSU – Single Leg Split Leap – Front (each side)         | 20" |   |     |    |
|                                                  | BOSU – Single Leg Split Leap – Lateral Front (each side) | 20" |   |     |    |
| Main Exercise                                    |                                                          |     |   |     |    |
| Hip Extension Training                           |                                                          |     | 2 | 5"  | 2' |
|                                                  | Stability Ball – Hip Raise                               | 30" |   |     |    |
|                                                  | Stiff-legged Deadlift – Single Leg (each side)           | 30" |   |     |    |
|                                                  | Russian Hamstring Exercise                               | 30" |   |     |    |
| Plyometrics Training - Hop                       |                                                          |     | 1 | 10" |    |
|                                                  | Hurdle – Hop – Front (each side)                         | 6   |   |     |    |
|                                                  | Hurdle – Hop – Lateral (each side)                       | 6   |   |     |    |
|                                                  | Hurdle – Hop – Front and Body Rotation 90° (each side)   | 6   |   |     |    |
|                                                  | Hurdle – Hop – Lateral and Body Rotation 90° (each side) | 6   |   |     |    |
| Plyometrics Training – Bound                     |                                                          |     | 1 | 10" |    |
|                                                  | Hurdle – Bound – Front (each side)                       | 6   |   |     |    |

|                                                                 |     |   |     |    |
|-----------------------------------------------------------------|-----|---|-----|----|
| Hurdle – Bound – Lateral (each side)                            | 6   |   |     |    |
| Hurdle – Bound – Front and Body Rotation 90° (each side)        | 6   |   |     |    |
| Hurdle – Bound – Lateral and Body Rotation 90° (each side)      | 6   |   |     |    |
| Warm-down (same as Week 1)                                      |     |   |     |    |
| <b>Week 4</b>                                                   |     |   |     |    |
| Warm-up                                                         |     |   |     |    |
| Trunk Strengthening Exercise                                    |     | 1 | 5"  |    |
| Pillar Bridge – Alternating Opposites (each side)               | 15" |   |     |    |
| Pillar Bridge – Lateral (each side)                             | 15" |   |     |    |
| Dynamic Stretching (same as Week 1)                             |     |   |     |    |
| Movement Integration and Proprioceptive Training                |     | 1 | 5"  |    |
| Squat Up Against the Stability Ball                             | 20" |   |     |    |
| BOSU – Jump                                                     | 20" |   |     |    |
| BOSU – Squat and Push Medicine Ball Upward                      | 20" |   |     |    |
| BOSU – Squat and Push Medicine Ball Lateral-forward (each side) | 20" |   |     |    |
| Main Exercise                                                   |     |   |     |    |
| Hip Extension Training                                          |     | 2 | 5"  | 2' |
| Leg Twist on Back                                               | 30" |   |     |    |
| Nordic Hamstring Exercise                                       | 30" |   |     |    |
| Glute Bridge – Marching                                         | 30" |   |     |    |
| Plyometrics Training – Hop                                      |     | 1 | 10" |    |
| Box – Hop – Front (each side)                                   | 6   |   |     |    |
| Box – Hop – Lateral (each side)                                 | 6   |   |     |    |
| Box – Hop – Front and Body Rotation 90° (each side)             | 6   |   |     |    |
| Box – Hop – Lateral and Body Rotation 90° (each side)           | 6   |   |     |    |
| Plyometrics Training – Combination of Hop (each side)           | 8   | 2 |     | 2' |
| Plyometrics Training – Bound                                    |     | 2 | 10" | 2' |
| Box – Bound – Front (each side)                                 | 6   |   |     |    |
| Box – Bound – Lateral (each side)                               | 6   |   |     |    |
| Box – Bound – Front and Body Rotation 90° (each side)           | 6   |   |     |    |

|                                                         |   |   |    |
|---------------------------------------------------------|---|---|----|
| Box – Bound – Lateral and Body Rotation 90° (each side) | 6 |   |    |
| Plyometrics Training – Combination of Bound (each side) | 8 | 3 | 1' |
| Warm-down (same as Week 1)                              |   |   |    |
